# Supplementary material
Source: PubMed Central journal article supplement (PMC4909560)
Supplement: supp_WNL.0000000000002766_Table_e-1.pdf [file supp_WNL.0000000000002766_Table_e-1.pdf]

**Supplementary Table e-1. Diets, supplements, and medication information.**

|                                             | Visit 1                    |                           |         | Visit 2                    |                           |         |
|---------------------------------------------|----------------------------|---------------------------|---------|----------------------------|---------------------------|---------|
|                                             | CSF 5- MTHF<br>≥ 40 nmol/L | CSF 5-MTHF<br>< 40 nmol/L | Total   | CSF 5- MTHF<br>≥ 40 nmol/L | CSF 5-MTHF<br>< 40 nmol/L | Total   |
| n                                           | 62                         | 5                         | 67      | 24                         | 7                         | 31      |
| <b>Special diets<sup>a</sup>, n(%)</b>      |                            |                           |         |                            |                           |         |
| Gluten-Free                                 | 1 (2)                      | 1 (20)                    | 2 (3)   | 1 (4)                      | 0 (0)                     | 1 (3)   |
| Casein-Free                                 | 3 (5)                      | 0 (0)                     | 3 (4)   | 1 (4)                      | 0 (0)                     | 1 (3)   |
| Gluten and<br>Casein-Free                   | 17 (27)                    | 2 (40)                    | 19 (28) | 1 (4)                      | 6 (86)                    | 7 (23)  |
| Severely Limited/<br>Preference             | 2 (3)                      | 0 (0)                     | 2 (3)   | 0 (0)                      | 0 (0)                     | 0 (0)   |
| Miscellaneous<br>Restrictions               | 9 (15)                     | 1 (20)                    | 10 (15) | 1 (4)                      | 3 (43)                    | 4 (13)  |
| None                                        | 36 (58)                    | 2 (40)                    | 38 (57) | 21 (88)                    | 1 (14)                    | 22 (71) |
| <b>Supplements<sup>b</sup>, n(%)</b>        |                            |                           |         |                            |                           |         |
| Vitamins                                    | 24 (39)                    | 3 (60)                    | 27 (40) | 12 (50)                    | 4 (57)                    | 16 (52) |
| Minerals                                    | 9 (15)                     | 2 (40)                    | 11 (16) | 1 (4)                      | 2 (29)                    | 3 (10)  |
| Omega-3                                     | 14 (23)                    | 4 (80)                    | 18 (27) | 2 (8)                      | 2 (29)                    | 4 (13)  |
| Probiotic                                   | 7 (11)                     | 0 (0)                     | 7 (10)  | 1 (4)                      | 1 (14)                    | 2 (6)   |
| Amino Acid                                  | 4 (6)                      | 0 (0)                     | 4 (6)   | 1 (4)                      | 1 (14)                    | 2 (6)   |
| Folic Acid (B9)<br>Cyanocobalamine<br>(B12) | 2 (3)                      | 0 (0)                     | 2 (3)   | 1 (4)                      | 0 (0)                     | 1 (3)   |
| None                                        | 5 (8)                      | 1 (20)                    | 6 (9)   | 1 (4)                      | 0 (0)                     | 1 (3)   |
| None                                        | 31 (50)                    | 0 (0)                     | 31 (46) | 10 (42)                    | 3 (43)                    | 13 (42) |

|                                        | Visit 1                    |                           |           | Visit 2                    |                           |           |
|----------------------------------------|----------------------------|---------------------------|-----------|----------------------------|---------------------------|-----------|
|                                        | CSF 5- MTHF<br>≥ 40 nmol/L | CSF 5-MTHF<br>< 40 nmol/L | Total     | CSF 5- MTHF<br>≥ 40 nmol/L | CSF 5-MTHF<br>< 40 nmol/L | Total     |
| <b>Medications<sup>c</sup>, n(%)</b>   |                            |                           |           |                            |                           |           |
| Antihistamine                          | 7 (11)                     | 1 (20)                    | 8 (12)    | 1 (4)                      | 1 (14)                    | 2 (6)     |
| Anticonvulsant                         | 4 (6)                      | 0 (0)                     | 4 (6)     | 4 (17)                     | 2 (29)                    | 6 (25)    |
| Antipsychotic<br>(dopaminergic)        | 2 (3)                      | 0 (0)                     | 2 (3)     | 3 (13)                     | 0 (0)                     | 3 (10)    |
| SSRI                                   | 2 (3)                      | 0 (0)                     | 2 (3)     | 1 (4)                      | 0 (0)                     | 1 (3)     |
| Stimulant                              | 3 (5)                      | 0 (0)                     | 3 (4)     | 6 (25)                     | 1 (14)                    | 7 (23)    |
| Steroid                                | 4 (6)                      | 1 (20)                    | 5 (7)     | 3 (13)                     | 0 (0)                     | 3 (10)    |
| Bronchodilator                         | 3 (5)                      | 1 (20)                    | 4 (6)     | 1 (4)                      | 0 (0)                     | 1 (3)     |
| Hormone                                | 12 (19)                    | 1 (20)                    | 13 (19)   | 5 (21)                     | 3 (43)                    | 8 (26)    |
| Chelating Agent                        | 3 (5)                      | 1 (20)                    | 4 (6)     | 0 (0)                      | 0 (0)                     | 0 (0)     |
| Antifungal                             | 4 (6)                      | 1 (20)                    | 5 (7)     | 1 (4)                      | 0 (0)                     | 1 (3)     |
| Other                                  | 14 (23)                    | 1 (20)                    | 15 (22)   | 9 (38)                     | 2 (29)                    | 11 (35)   |
| None                                   | 32 (52)                    | 1 (20)                    | 32 (48)   | 6 (25)                     | 2 (29)                    | 8 (26)    |
| <b>Number of<br/>Medications, M±SD</b> | 1.24±1.89                  | 1.60±1.14                 | 1.27±1.84 | 1.83±1.74                  | 1.57±1.27                 | 1.77±1.63 |
| Range                                  | (0, 8)                     | (0, 3)                    | (0, 8)    | (0, 5)                     | (0, 3)                    | (0, 5)    |

<sup>a</sup>Diets are not mutually exclusive, with the exception of Gluten Free and Casein Free (children with both restrictions are listed only in the Gluten & Casein Free category). Miscellaneous restrictions include soy, egg, and corn.

<sup>b</sup>Vitamins included choline, fluoride, multivitamin, phosphalinem vitamin C, vitamin D, vitamin B complex. Minerals included calcium, magnesium, and zinc. “Other” included niacin (B6), cholesterol, CoQ10, enzymes, garlic tablet, milk thistle. Supplement categories are not mutually exclusive.

<sup>c</sup>Hormones included melatonin and growth hormone. Other category included a wide range of medications that did not belong to the classifications above or where the category had only one member; list available upon request. Medication categories are not mutually exclusive.
